# Supplementary material for: Moderators of the Impact of (Poly)Phenols Interventions on Psychomotor Functions and BDNF: Insights from Subgroup Analysis and Meta-Regression
Source: MDPI journal article supplement (doi:10.3390/nu12092872), 2020-09-19
Supplement: s1 [file s1]

|             |                                                                                                                                                                                                                        |   |   |   |   |   |   |   |   |   |   |   |   |   |   |
|-------------|------------------------------------------------------------------------------------------------------------------------------------------------------------------------------------------------------------------------|---|---|---|---|---|---|---|---|---|---|---|---|---|---|
| 8           | Measures of at least one key outcome were obtained from more than 85% of the subjects initially allocated to groups                                                                                                    | + | + | + | + | + | + | + | + | + | + | + | + | + | + |
| 9           | All subjects for whom outcome measures were available received the treatment or control condition as allocated or, where this was not the case, data for at least one key outcome was analysed by "intention to treat" | + | + | + | + | + | + | + | + | + | + | + | + | + | + |
| 10          | The results of between-group statistical comparisons are reported for at least one key outcome                                                                                                                         | + | + | + | + | + | + | + | + | + | + | + | + | + | + |
| 11          | The study provides both point measures and measures of variability for at least one key outcome                                                                                                                        | + | + | + | + | + | + | + | + | + | + | + | + | + | + |
| Total score |                                                                                                                                                                                                                        | 8 | 9 | 9 | 9 | 9 | 9 | 9 | 9 | 7 | 9 | 9 | 9 | 9 | 9 |

**Table S2.** Meta-regression for gender, phenolic dose and nature of phenolic compound to predict the effect of (poly) phenols-rich supplementation on psychomotor functions.

| <b>Variables</b>            | <b>Psychomotor functions</b> |           |                     |                     |                |                |
|-----------------------------|------------------------------|-----------|---------------------|---------------------|----------------|----------------|
| <b>Decimal</b>              | <b>Coefficient</b>           | <b>SE</b> | <b>95% lower CI</b> | <b>95% upper CI</b> | <b>Z-value</b> | <b>P value</b> |
| Gender                      | -0.02                        | 0.008     | -0.036              | 0.004               | -2.48          | 0.013          |
| Phenolic dose               | 0.001                        | 0.001     | -0.001              | 0.002               | -0.75          | 0.453          |
| <b>Categorical</b>          | <b>Q</b>                     |           | <b>df</b>           |                     | <b>P value</b> |                |
| Nature of phenolic compound | 7.62                         |           | 6                   |                     | 0.267          |                |

Abbreviations: SE: standard error, CI: confidence interval.

**Table S3.** Meta-regression for gender, phenolic dose and nature of phenolic compound to predict the effect of (poly) phenols-rich supplementation on BDNF blood concentrations.

| <b>Variables</b>            | <b>BDNF</b>        |           |                     |                     |                |                |
|-----------------------------|--------------------|-----------|---------------------|---------------------|----------------|----------------|
| <b>Decimal</b>              | <b>Coefficient</b> | <b>SE</b> | <b>95% lower CI</b> | <b>95% upper CI</b> | <b>Z-value</b> | <b>P value</b> |
| Gender                      | 0.001              | 0.028     | -0.054              | 0.055               | 0.02           | 0.982          |
| Phenolic dose               | 0.004              | 0.002     | -0.001              | 0.008               | 1.68           | 0.093          |
| <b>Categorical</b>          | <b>Q</b>           |           | <b>df</b>           |                     | <b>P value</b> |                |
| Nature of phenolic compound |                    |           | NA                  |                     |                |                |

Abbreviations: NA: not applicable, SE: standard error, BDNF: Brain-Derived Neurotrophic Factor, CI: confidence interval.

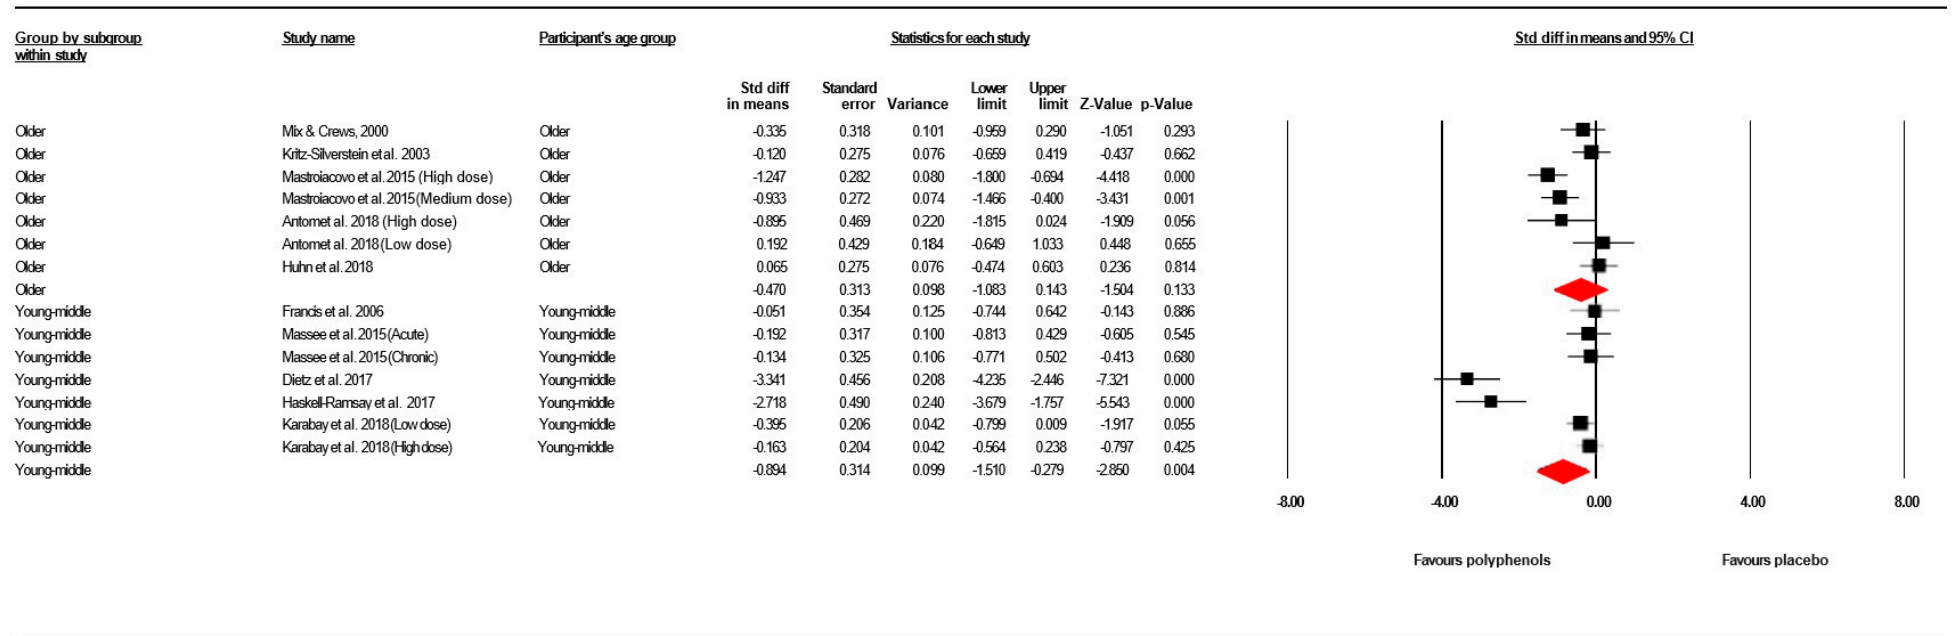

Figure S1. Plot of studies investigating the effect of (poly)phenols-rich supplementation on psychomotor function in old- and young/middle-aged adults.

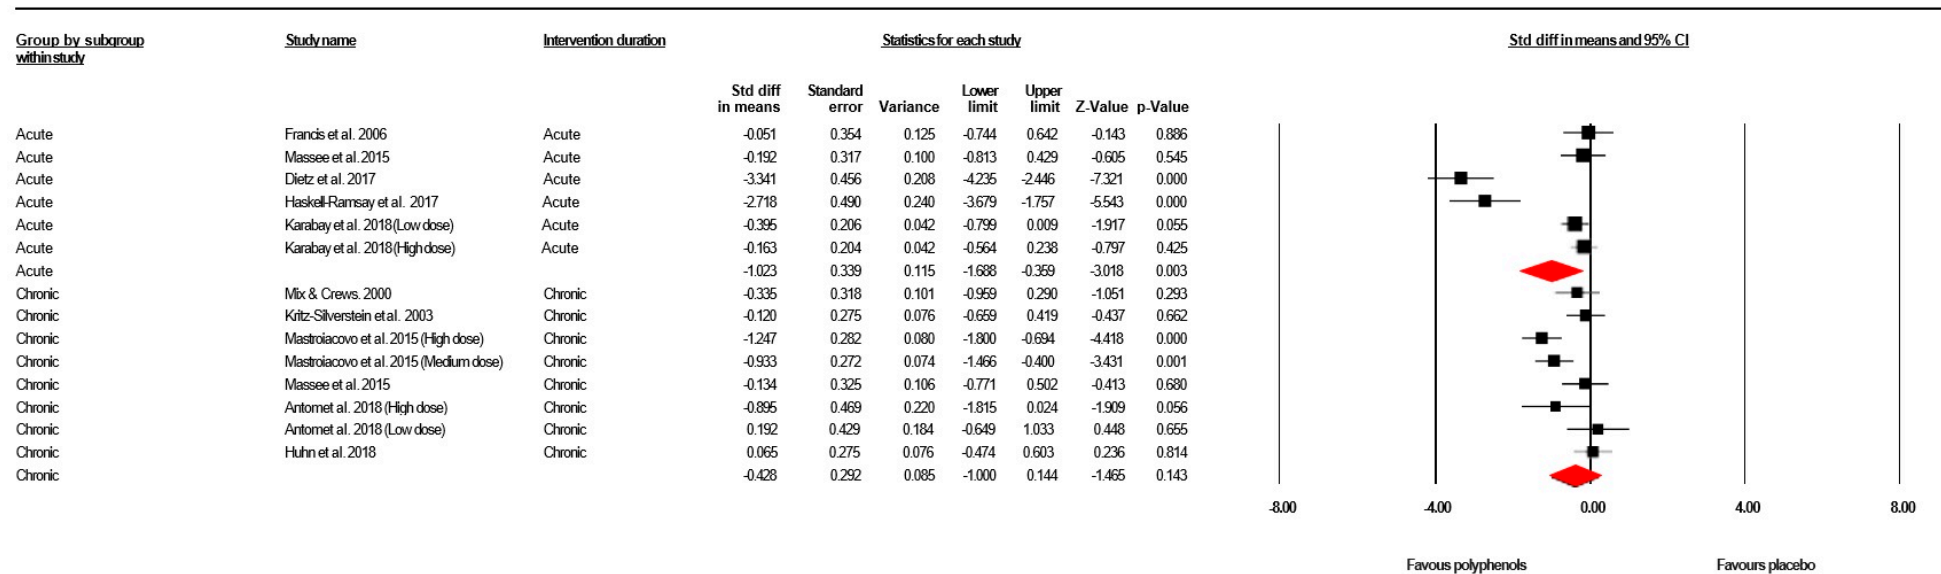

Figure S2. Plot of studies investigating the acute and chronic effect of (poly) phenols-rich supplementation on psychomotor function.

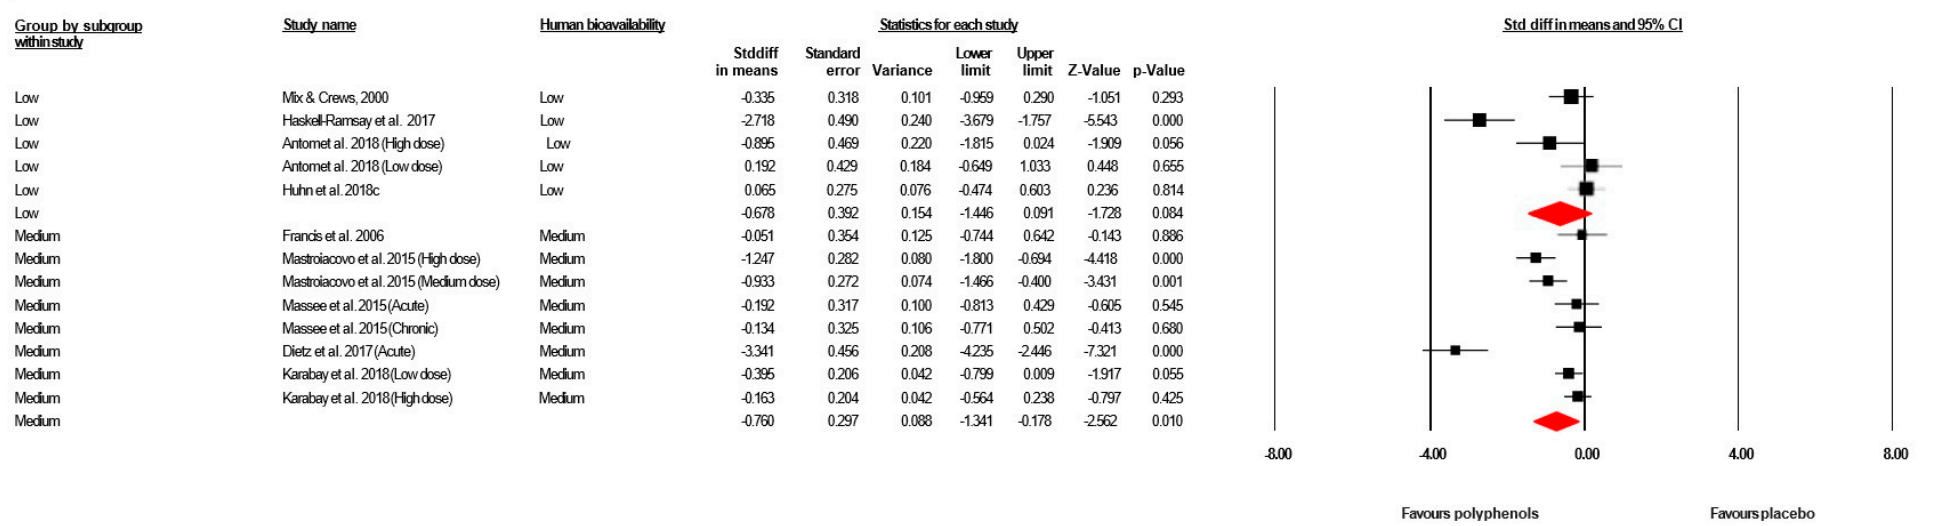

Figure S3. Plot of studies investigating the effect of (poly) phenols-rich supplementation with low and medium human bioavailability on psychomotor function.

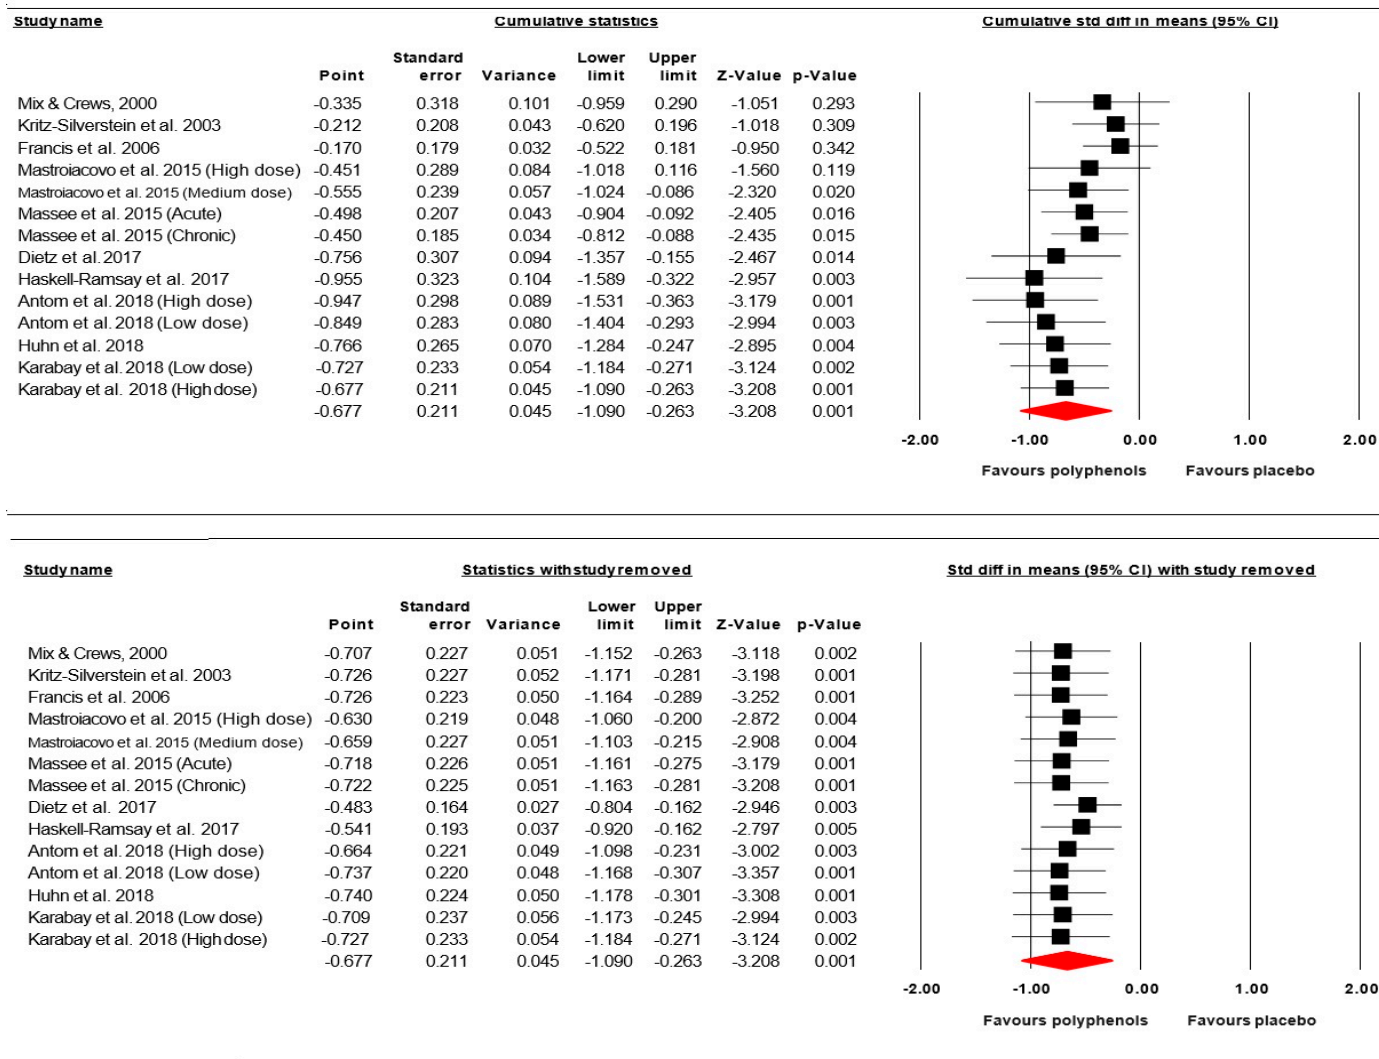

Figure S4. Cumulative statistics and statistics with study removed for studies investigating the effect of (poly)phenols-rich supplementation on psychomotor functions.

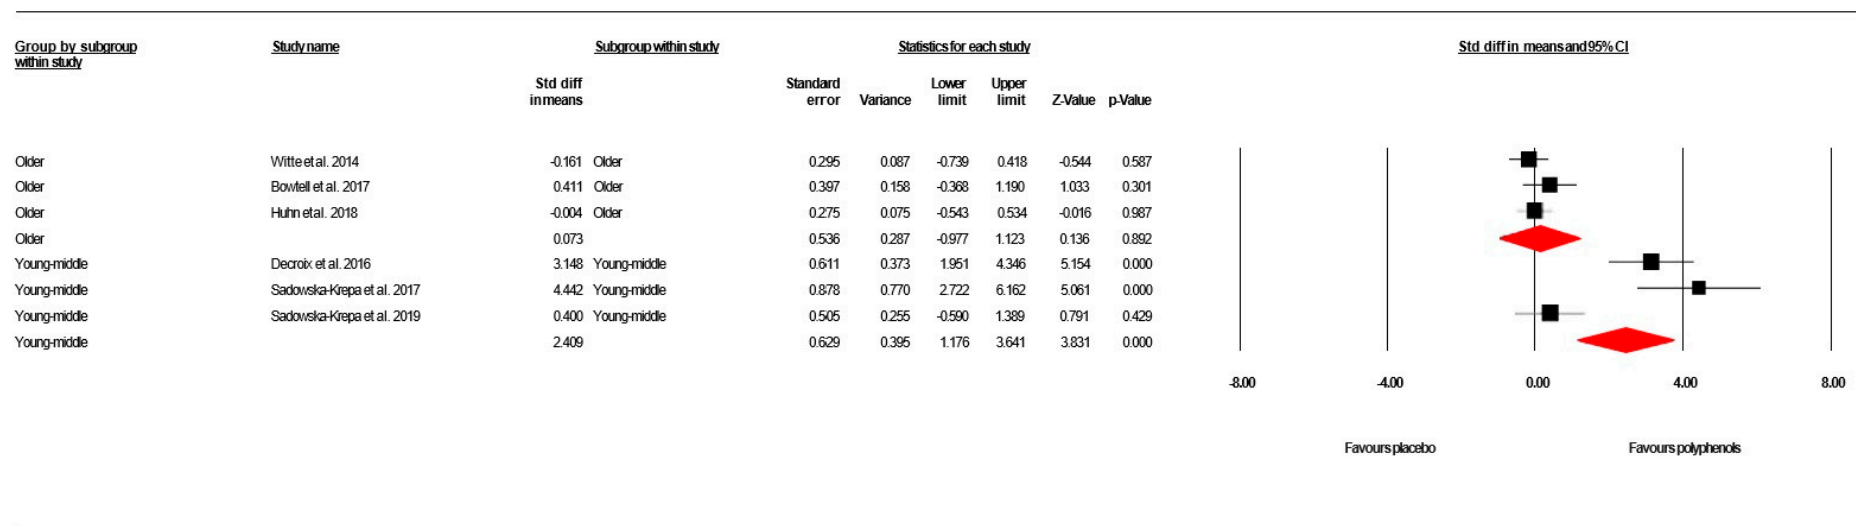

**Figure S5.** Plot of studies investigating the effect of (poly) phenols-rich supplementation on BDNF in old- and young/middle-aged adults.



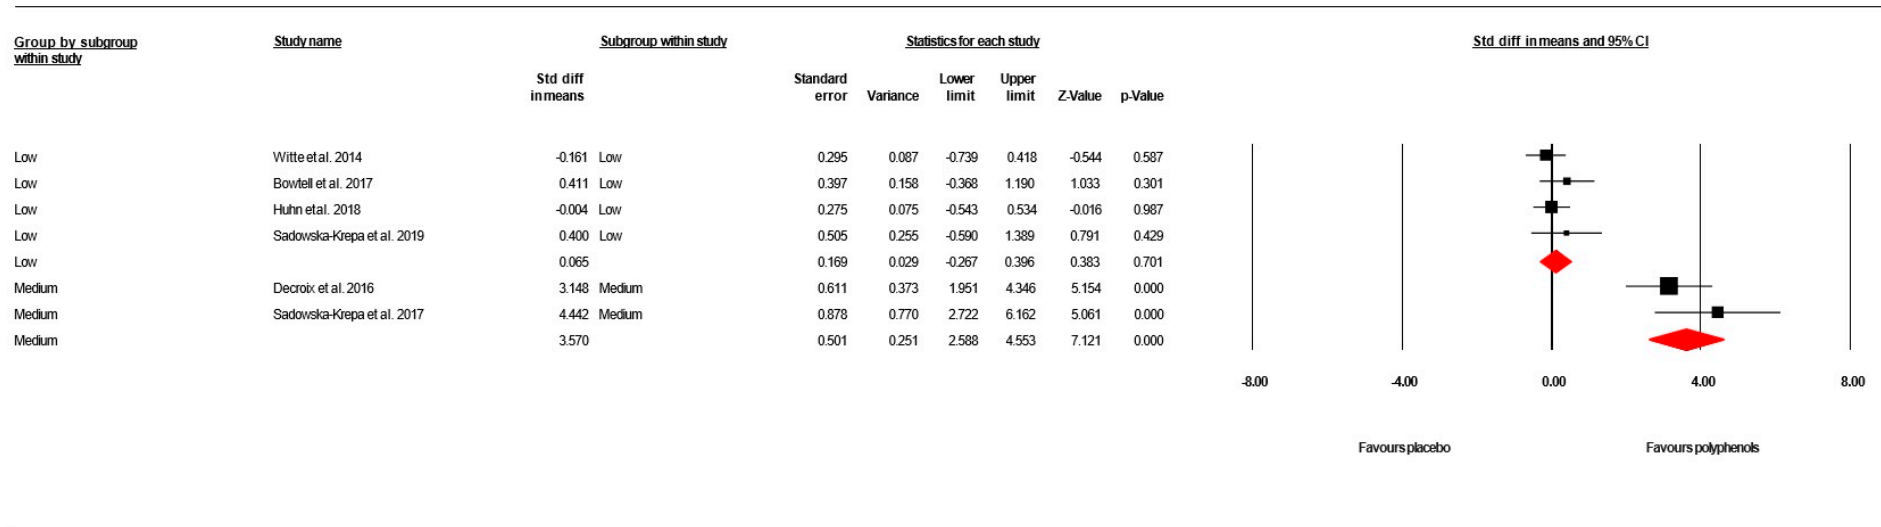

**Figure S6.** Plot of studies investigating the effect of (poly)phenols-rich supplementation with low and medium human bioavailability on BDNF.

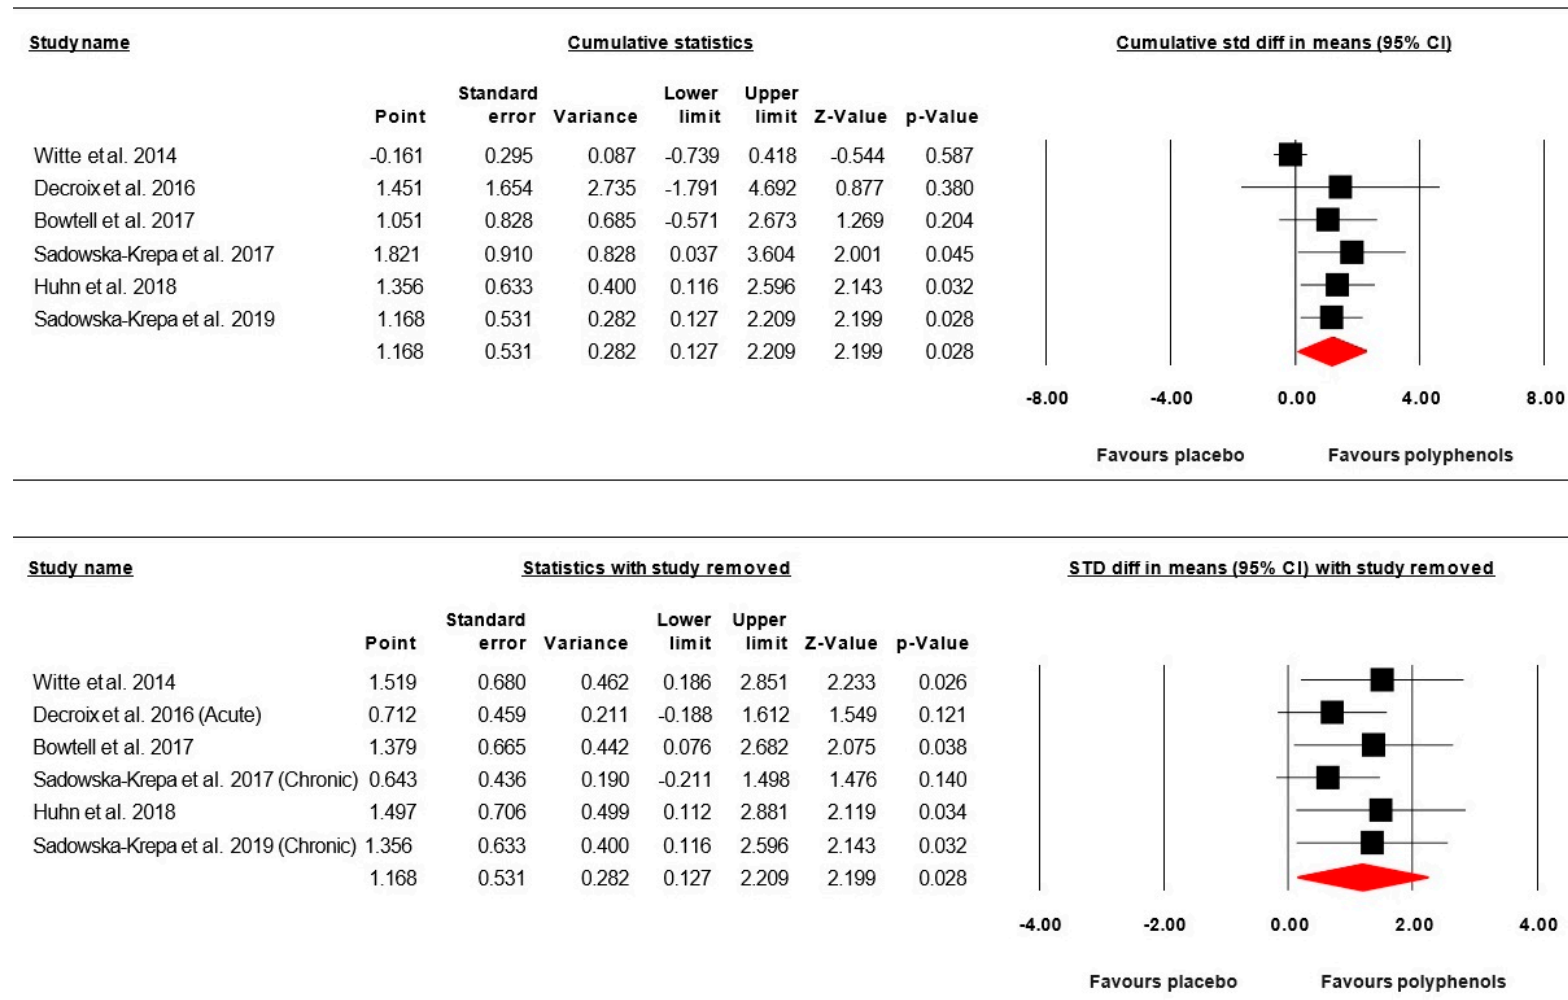

**Figure S7.** Cumulative statistics and statistics with study removed for studies investigating the effect of (poly)phenols-rich supplementation on BDNF.
